# Supplementary material
Source: PubMed Central journal article supplement (PMC7164875)
Supplement: mmc1.pdf [file mmc1.pdf]

# THE LANCET

## Supplementary appendix

This translation in Chinese was submitted by the authors and we reproduce it as supplied. It has not been peer reviewed. *The Lancet's* editorial processes have only been applied to the original in English, which should serve as reference for this manuscript.

此简体中文译文由作者提交，我方按照提供的版本刊登。此译文并未经过同行审阅。医学期刊《柳叶刀》的编辑流程仅适用于英文原稿，英文原稿应作为此手稿的参考。

Supplement to: Li H, Liu L, Zhang D, et al. SARS-CoV-2 and viral sepsis: observations and hypotheses. *Lancet* 2020; published online April 17. [http://dx.doi.org/10.1016/S0140-6736\(20\)30920-X](http://dx.doi.org/10.1016/S0140-6736(20)30920-X).

# SARS-CoV-2 病毒性脓毒症：临床发现和科学假说

李辉<sup>1</sup>，刘良<sup>2</sup>，张定宇<sup>3</sup>，徐九洋<sup>4</sup>，代华平<sup>1</sup>，汤楠<sup>5</sup>，苏泉<sup>6</sup>，曹彬<sup>1</sup>

1 中日友好医院呼吸中心，中国医学科学院呼吸病学研究院，呼吸疾病国家临床研究中心

2 华中科技大学同济医学院

3 武汉金银潭医院

4 清华大学医学院

5 北京生命科学研究所

6 上海巴斯德研究所

## 摘要

自 COVID-19 爆发以来，临床医生已尽一切努力来了解这种疾病，现在我们已经对它的临床特征有了大致的了解。在临床实践中我们发现，即使没有明显的低血压，许多重症或危重症 COVID-19 患者也出现了肢冷和脉搏细弱等典型的休克临床表现。理解 COVID-19 中的病毒性脓毒症的机制有助于探索如何为这些患者提供更好的临床救治。在与从事 COVID-19 研究的基础科学家、病理学家和临床医生进行多轮讨论后，我们结合最近对 COVID-19 的尸检病理研究以及先前对 SARS-CoV-2 和 SARS-CoV 进行的基础科学研究所证据，提出了关于 SARS-CoV-2 发病机理的若干假设。我们认为病毒性脓毒症对 COVID-19 的发病机制至关重要。虽然这些想法可能会在将来被证明是不完美的，甚至是错误的，但我们相信，这些观点此刻可以为基础研究提供思路和指导方向。

## 背景

严重急性呼吸系统综合征冠状病毒 2 (SARS-CoV-2) 疫情，最早于 2019 年 12 月在武汉市首次报道，对中国乃至整个世界都产生了巨大影响。由 SARS-CoV-2 引起的疾病被称为冠状病毒病 2019 (简称 COVID-19)。截止到 2020 年 3 月 19 日，确诊病例数已经增加到 20 万以上。尽管大多数感染 SARS-CoV-2 的患者仅有轻微症状，但约有 5% 的患者恶化为严重的肺损伤甚至

多器官功能障碍，病死率约为 1.4%<sup>1</sup>。

在临床实践中我们发现，即使没有明显的低血压，许多重症或危重症 COVID-19 患者也出现了肢冷和脉搏细弱等典型的休克临床表现。这些患者中许多都表现出严重的代谢性酸中毒，表明可能存在微循环功能障碍。此外，除严重的肺损伤外，一些患者也有肝脏<sup>2</sup>和肾脏功能受损。这些患者符合 Sepsis-3 共识<sup>3</sup>中关于脓毒症和脓毒症休克诊断标准，但 SARS-CoV-2 感染似乎是大多数患者的唯一病因<sup>1</sup>。在最近报道的一项 COVID-19 研究中，76%脓毒症患者的血液和下呼吸道标本细菌和真菌培养结果呈阴性<sup>4</sup>。因此，用“病毒性脓毒症”来描述重症或危重症 COVID-19 患者的临床表现更加准确<sup>5</sup>。理解 COVID-19 中病毒性脓毒症的机制有助于探索为这些患者提供更好的临床救治。

### **病毒感染和 COVID-19 全身多脏器受累**

在活检或尸检病理研究中，早期<sup>6</sup>和晚期<sup>7</sup>COVID-19 患者的肺部病理表现均出现弥漫性肺泡损害伴有透明膜形成，肺泡腔内单核细胞和巨噬细胞浸润，肺泡壁弥漫性增厚。通过电子显微镜，在支气管上皮和 2 型肺泡上皮细胞中可以观察到病毒颗粒<sup>8,9</sup>。此外，一些患者还存在脾萎缩，肺门淋巴结坏死，肾脏局灶性出血，肝脏肿大并伴有炎性细胞浸润，脑神经元水肿和分散的神经元变性。从 COVID-19 患者的呼吸道样本，以及粪便<sup>10</sup>和尿液<sup>11</sup>样本中均分离出了 SARS-CoV-2 感染性病毒颗粒，这表明重症 COVID-19 患者的多器官功能障碍至少部分是由感染直接攻击引起的。但是，目前在尸检中尚未发现病毒在多器官广泛播散。SARS-CoV-2 是否可以直接靶向除肺以外的其它器官，特别是那些高表达 ACE2<sup>12,13</sup>和 L-SIGN<sup>14</sup>（均为 SARS-CoV-2 可能的细胞受体）的器官，还不得而知。此外，SARS-CoV-2 如何传播到肺外器官仍然是一个谜。目前已经观察到流行的 SARS-CoV-2 病毒株出现了基因组变异，但是这些变异是否造成病毒毒力的改变还需要进一步研究<sup>15</sup>。

### **以细胞因子风暴和淋巴细胞减低为特征的宿主免疫反应失调是 SARS-CoV-2 感染的突出表现**

研究发现 COVID-19 患者促炎细胞因子和趋化因子 TNF- $\alpha$ ，IL-1 $\beta$ ，IL-6，

G-SCF, IP-10, MCP1 和 MIP1 $\alpha$  水平显著升高<sup>16,17</sup>。和重症流感相似, 细胞因子风暴可能在 COVID-19 的免疫致病机理中起重要作用。此前研究表明, 在流感病毒感染中, 肺上皮细胞、巨噬细胞和树突状细胞 (DC) 都通过模式识别受体 (PRR) 的激活在一定程度上释放细胞因子; 被激活的 PRR 包括 Toll 样受体 TLR3, TLR7 和 TLR8, 视黄酸诱导型基因 I (RIG-1) 和 NOD 样受体家族<sup>18</sup>。但是, 目前对 COVID-19 细胞因子如何释放仍然知之甚少。识别 SARS-CoV-2 感染后细胞因子的主要来源, 以及细胞因子风暴背后的病毒学机制, 对理解 COVID-19 的致病机理至关重要。此外, 将来的研究也需要阐明细胞因子激活的动态变化: 感染后多长时间机体释放出第一批细胞因子? 细胞因子有哪些? 另外, 重症 COVID-19 患者的多器官功能衰竭是由什么机制造成的? 病毒感染造成的直接组织损伤, 还是全身性细胞因子风暴? 或是两者的协同作用导致? 这个问题同样值得研究。另外, 阻断这些促炎介质是否会影响患者的临床结局, 这个问题也值得关注。有人提出可以利用抗 IL-6R 单克隆抗体或糖皮质激素来对抗病毒感染后的炎症反应。但是, (除造成炎症损伤之外) IL-6 可能通过促进嗜中性粒细胞介导的病毒清除, 在病毒感染后的初步免疫反应中发挥重要作用; 一项研究表明, IL-6 / IL-6R 缺乏会导致流感病毒感染状态持续存在, 并最终导致小鼠死亡<sup>19</sup>。糖皮质激素的使用目前仍存在争议<sup>20,21</sup>。

另一方面, 免疫反应失调还包括炎症期后的免疫抑制阶段。其特征是在 COVID-19 患者中出现外周淋巴细胞计数 (主要是 CD4 T 和 CD8 T 细胞) 持续且显著减低; 并且淋巴细胞减低与继发性细菌感染相关<sup>4</sup>。淋巴细胞减低在重症流感和其他呼吸道病毒感染中同样存在。在 COVID-19 中, 已经有研究显示淋巴细胞减少的程度与疾病的严重程度相关。淋巴细胞减少的机制仍然未知。此前研究发现, 从各个器官 (外周血、脾脏、淋巴结、多种器官的淋巴组织) 分离的 T 淋巴细胞中可以检测到 SARS 样病毒颗粒和 SARS-CoV 病毒 RNA<sup>22,23</sup>, 这表明 SARS-CoV 可能直接感染 T 淋巴细胞。SARS-CoV-2 和 SARS-CoV 的刺突蛋白受体结合域 (RBD) 显示出高度的一致性<sup>24,25</sup>, 并且在 SARS-CoV-2 感染患者的血液样本中也能检测到病毒 RNA<sup>16</sup>。因此, 一个合理的假设是, 除了由 Fas / Fas-L 和 IFN / TRAIL 介导的细胞活化和细胞死亡外, SARS-CoV-2 还可直接感染淋巴细胞, 特别是 T 淋巴细胞, 并启动或促进淋巴细胞死亡, 最

终导致淋巴细胞减少和抗病毒反应减弱。但是，这种假设需要进一步研究。并且我们还需要确定 SARS-CoV-2 感染后淋巴细胞中发生了哪些类型的细胞死亡。此外，值得注意的是淋巴细胞缺乏 ACE2 表达，这表明 SARS-CoV-2 感染 T 淋巴细胞存在另一种机制<sup>13</sup>。肺泡巨噬细胞是否可以吞噬病毒颗粒然后转移到淋巴细胞是该领域一个令人兴奋的悬而未决的问题。

### 重症 COVID-19 患者存在凝血功能异常

有研究发现，在 COVID-19 病程晚期，71.4%的死亡患者符合 DIC 诊断标准（ $\geq 5$  分）<sup>27</sup>，并出现凝血功能异常，尤其是 D-二聚体和 FDP 显著增高与预后不良有关<sup>4</sup>。但是，凝血功能异常的具体机制仍待明确。SARS-CoV-2 病毒是否可以直接攻击 ACE2 高表达的血管内皮细胞<sup>13</sup>，并进而导致凝血功能异常和脓毒症仍待研究。同时，ACE2 也是一个重要血压调节分子。感染 SARS-CoV-2 病毒后，ACE2 在循环系统红的高表达可能是脓毒症性低血压的潜在原因<sup>28</sup>。对于合并高血压的 COVID-19 患者，ARB/ACE 抑制剂降压治疗仍有争议。一些研究者认为 ACE 抑制剂可以通过减轻肺部炎性反应的方式使患者获益<sup>29</sup>，但也有学者认为 ACE 抑制剂可能改变 ACE2 的表达水平并加速病毒进入细胞<sup>30</sup>。但是，目前尚无明确临床证据评估 ARB/ACE 抑制剂治疗对 COVID-19 患者的风险。这些药物是抑制还是促进病毒侵入细胞尚需进一步研究探索。

### 总结

基于对患者的临床观察，我们假设，在轻症 SARS-CoV-2 感染者中，肺部的巨噬细胞能够激活炎症反应并吞噬病毒，固有免疫和适应性免疫应答可有效抑制病毒的复制，患者可以很快康复。但是，在重症或危重症 COVID-19 患者中，肺泡上皮-内皮屏障（气-血屏障）的完整性会被严重破坏。SARS-CoV-2 病毒不仅会攻击肺泡上皮细胞，也会攻击肺毛细血管内皮细胞，导致大量浆液性成分漏出进入肺泡腔。SARS-CoV-2 病毒感染后，肺泡巨噬细胞和上皮细胞会释放大量促炎细胞因子和趋化因子；单核细胞和中性粒细胞会被募集到感染部位并清除含有病毒颗粒和感染细胞的渗出液，导致炎症反应失控。在这个过程中，由于显著的淋巴细胞数量减少和功能失调，适应性免疫难以有效启动。失控的病毒感染

会导致严重的巨噬细胞浸润，进一步加重肺损伤。同时，播散的 SARS-CoV-2 病毒也可直接攻击其它器官，免疫反应可导致系统性的炎症风暴，同时还有微循环障碍，这些因素一起作用最终引发病毒性脓毒症（图 1）。因此，有效的抗病毒治疗、调节固有免疫应答和重建适应性免疫应答的措施是打破恶性循环、改善患者预后的关键。

自 COVID-19 暴发以来，临床医生竭尽全力来了解这种疾病，现在我们已经对它的临床特征有了初步的认识。但是临床现象背后的机制仍有很多未知。基于近期 COVID-19 尸检研究和前期针对 SARS-CoV-2 病毒和 SARS-CoV 病毒的基础研究结果，我们和研究 COVID-19 的基础科学家、病理学家、临床医师经过多轮讨论后提出了关于 SARS-CoV-2 病理机制的一系列假设。我们认为病毒性脓毒症是 COVID-19 的一个关键致病机制。尽管这些假设可能并不完善、甚至之后可能被证明是错误的，但是我们相信这些临床观察可以为未来的实验室研究提供思路。

未来主要有以下几个研究重点：1.探讨 SARS-CoV-2 病毒是否可以直接攻击血管内皮细胞及其对凝血功能和病毒播散的影响；2.在临床试验或动物模型中，评估 ARB/ACE 抑制剂对 SARS-CoV-2 病毒感染结局的影响；3.确认 SARS-CoV-2 病毒是否可以直接感染淋巴细胞以及如何影响适应性免疫应答；4.细胞因子反应在 SARS-CoV-2 病毒感染过程中的动态变化；5.通过随机对照临床试验评估免疫调节药物的治疗效果。

## 致谢

我们感谢南开大学曹雪涛教授的指导和对本文的修改。

（翻译 商瀚瀚 徐九洋）
